# Supplementary material
Source: MDPI journal article supplement (https://www.mdpi.com/2073-4344/12/10/1241)
Supplement: s1 [file s1]

# **Hydrothermal Modification of TS-1 Zeolites with Organic Amines and Salts to Construct Highly Selective Catalysts for Cyclopentene Epoxidation**

**Xin-Yu Chang <sup>1,2</sup>, Yu-Ting Sun <sup>1</sup>, Xiao-Jing Song <sup>1,3</sup>, Xiao-Tong Yang <sup>1</sup>, Yu-Qing Wu <sup>2</sup> and Ming-Jun Jia <sup>1,\*</sup>**

<sup>1</sup> Key Laboratory of Surface and Interface Chemistry of Jilin Province, College of Chemistry, Jilin University, Changchun 130012, China

<sup>2</sup> State Key Laboratory of Supramolecular Structure and Materials, Institute of Theoretical Chemistry, College of Chemistry, Jilin University, Changchun 130012, China

<sup>3</sup> State Key Laboratory of Catalysis, iChEM, Dalian Institute of Chemical Physics, Chinese Academy of Sciences, Dalian 116023, China

\* Correspondence: [jiamj@jlu.edu.cn](mailto:jiamj@jlu.edu.cn); Tel.: (+86)431-85155390; Fax: (+86)431-85168420

**Table S1** Comparison catalytic performance of the TS-1 catalyst with literature reported catalysts for epoxidation of cyclopentene<sup>a</sup>

| Catalyst                                                           | H <sub>2</sub> O <sub>2</sub> /olefin | Temp/°C | Time/h | Conv./% | Sel. of epoxide/% | TOF/h <sup>-1</sup> | Ref.      |
|--------------------------------------------------------------------|---------------------------------------|---------|--------|---------|-------------------|---------------------|-----------|
| TS-1_R-0.05K                                                       | 1                                     | 40      | 2      | 52      | 98.2              | 175                 | this work |
| SBA-15-ImCl-PF <sub>6</sub> -W                                     | 2.1                                   | 35      | 3      | 53      | 99                | 87                  | [1]       |
| Ti-beta                                                            | 2                                     | 40      | 3      | 56.8    | 19.1              | 49                  | [2]       |
| TS-1                                                               | 2                                     | 40      | 3      | 80.3    | 20.7              | 55                  | [2]       |
| manganese sulfate monohydrated <sup>a</sup>                        | 2.7                                   | 5       | 1      | 96.4    | 44.32             | 34                  | [3]       |
| Mg <sub>0.5</sub> Co <sub>0.4</sub> Fe <sub>2</sub> O <sub>4</sub> | 1.5                                   | 60      | 8      | 95.2    | 96.3              | 43                  | [4]       |
| Ti-beta                                                            | 1                                     | 40      | 2      | 9.9     | 61.1              | 13                  | [5]       |
| TS-1                                                               | 1                                     | 40      | 2      | 13.3    | 91.8              | 29                  | [5]       |
| Ti-MWW-dry                                                         | 1                                     | 40      | 2      | 25.3    | 92.9              | 49                  | [5]       |
| R-Ti-MWW-PI                                                        | 1                                     | 40      | 2      | 40      | 99                | 80                  | [6]       |
| Co(III)-SBA-15                                                     | 1                                     | 40      | 12     | 40.3    | 18.1              | ~1                  | [7]       |
| H <sub>3</sub> PW <sub>12</sub> O <sub>40</sub>                    | 2                                     | 35      | 4      | 37.7    | 14.4              | ~0.2                | [8]       |
| H <sub>3</sub> PMo <sub>12</sub> O <sub>40</sub>                   | 2                                     | 35      | 4      | 9.4     | 33.5              | ~0.1                | [8]       |

<sup>a</sup> Add 0.1 mmol NaHCO<sub>3</sub> as a catalytic promoter

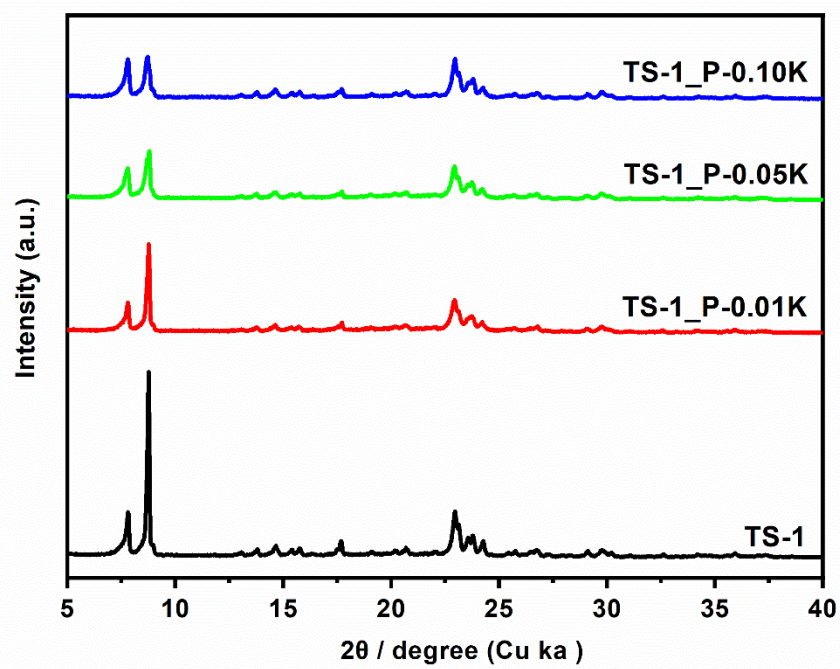

**Figure S1** XRD spectra of the TS-1 zeolites and after hydrothermal treatment.

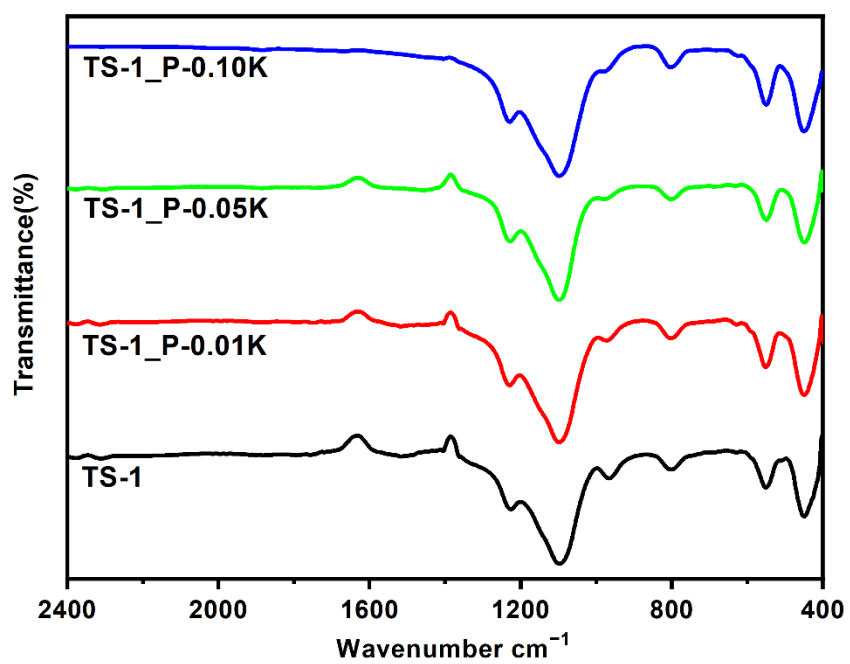

Figure S2 FTIR spectra of various TS-1 samples.



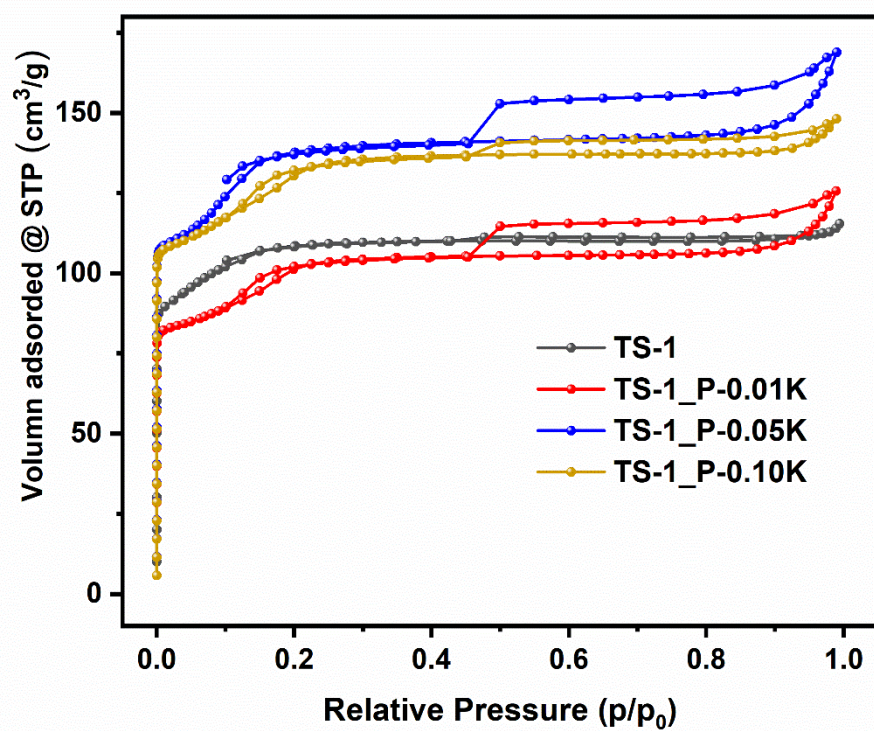

Figure S4 N<sub>2</sub> adsorption/desorption isotherms of the TS-1 samples before and after hydrothermal treatment.

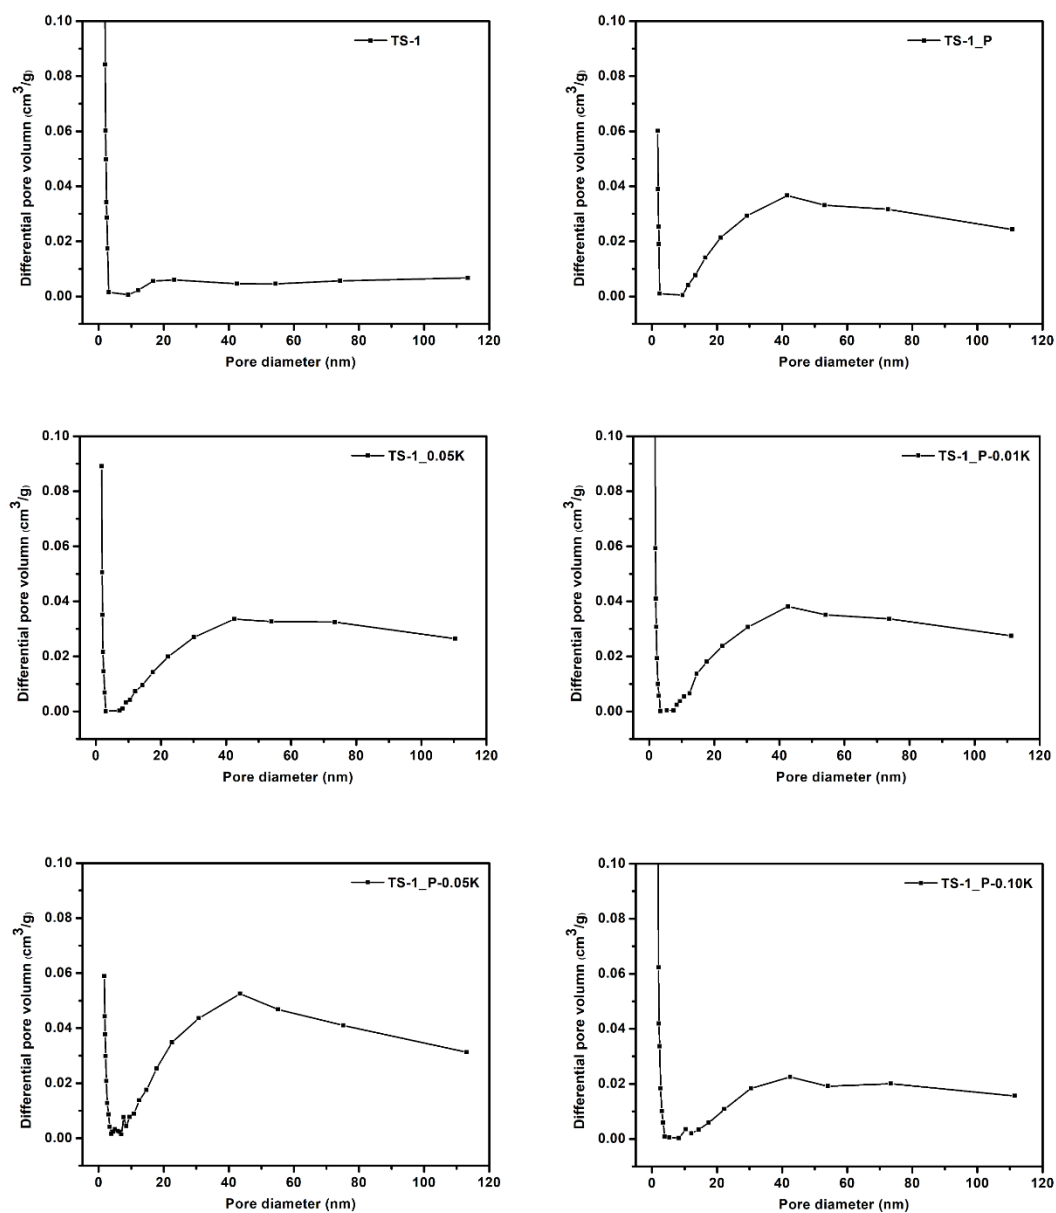

**Figure S5** Pore size distributions of various TS-1 zeolites.

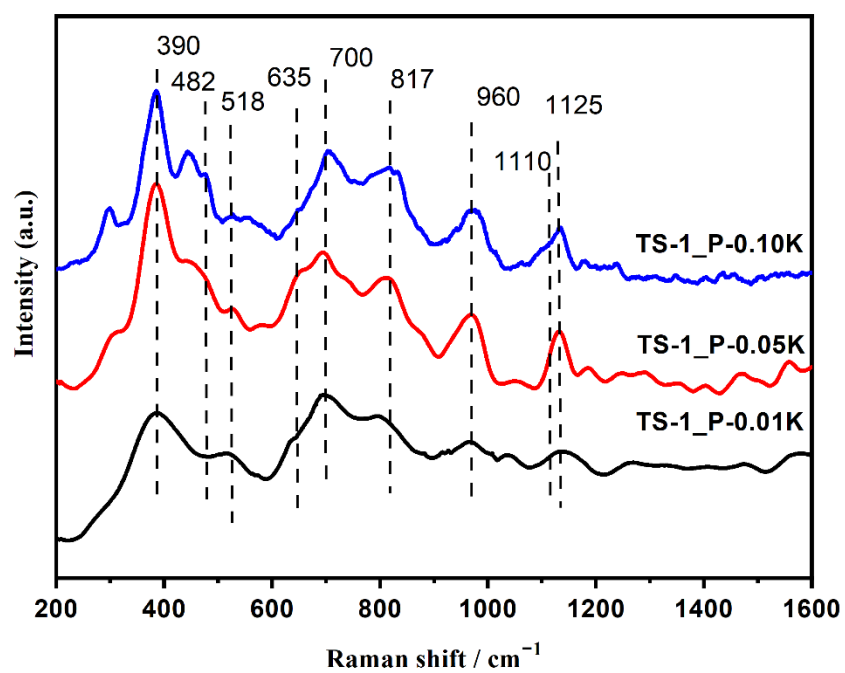

**Figure S6** UV-Raman spectra excited at 325 nm of various TS-1 samples.



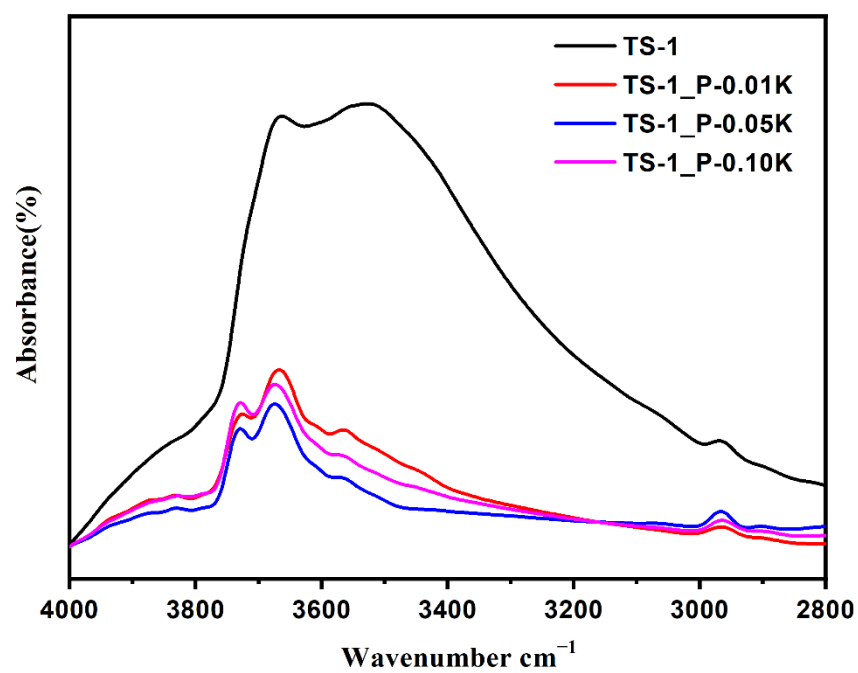

**Figure S7** FTIR spectra of hydroxyl groups of the TS-1 samples before and after hydrothermal treatment.

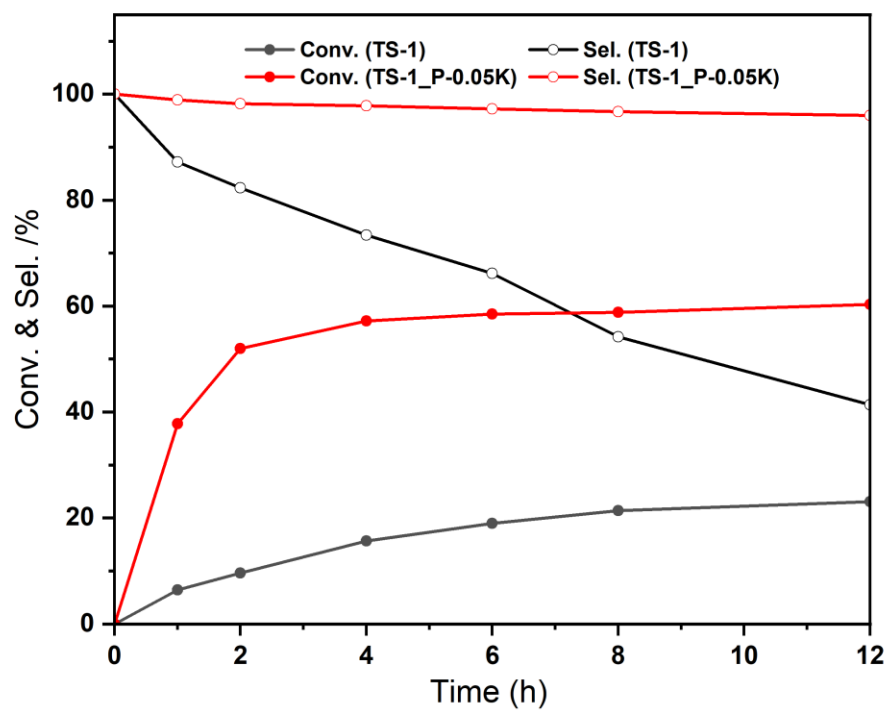

**Figure S8** Cyclopentene conversion and cyclopentene oxide selectivity over TS-1 and TS-1\_P-0.05K in methanol (Reaction conditions: catalyst 0.05 g, H<sub>2</sub>O<sub>2</sub> 10 mmol, CH<sub>3</sub>OH 10 mL, cyclopentene 10 mmol, reaction temperature 313 K).

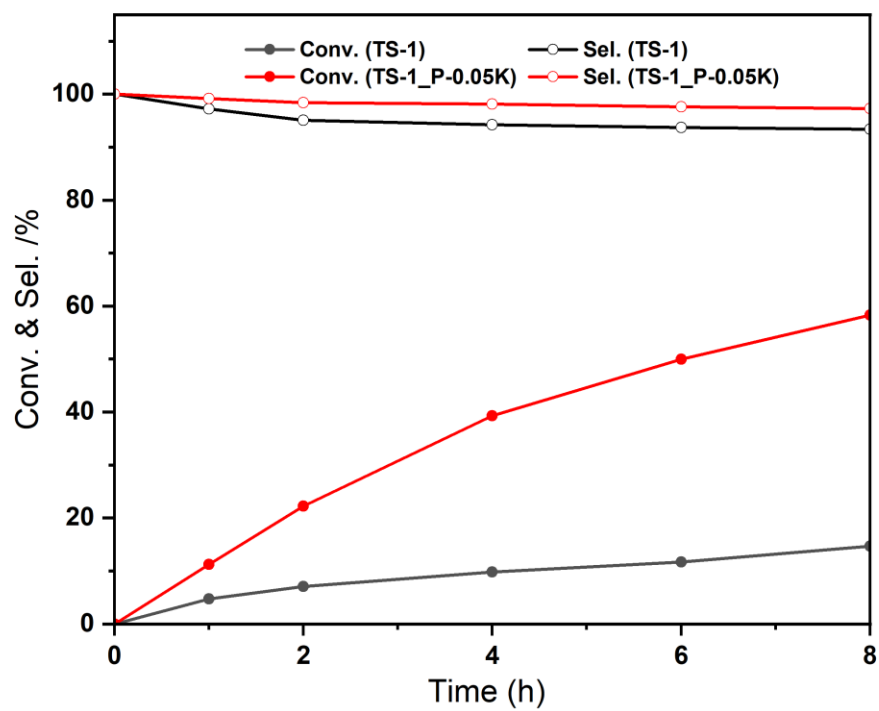

**Figure S9** Cyclopentene conversion and cyclopentene oxide selectivity over TS-1 and TS-1\_P-0.05K in acetonitrile (Reaction conditions: catalyst 0.05 g, H<sub>2</sub>O<sub>2</sub> 10 mmol, acetonitrile 10 mL, cyclopentene 10 mmol, reaction temperature 313 K).

## References (for Table S1)

1. Niu Q. T.; Liu G. D.; Lv Z. G.; Si C. D.; Jin M. M. Assembly of SBA-15 Derived Hybrid Heterogeneous Catalysts for Liquid Phase Cyclopentene Epoxidation, *Chemistryselect* **2021**, 6, 2111-2118.
2. Hulea V.; Dumitriu E.; Patcas F.; Ropot R.; Graffin P.; Moreau P. Cyclopentene oxidation with H<sub>2</sub>O<sub>2</sub> over Ti-containing zeolites, *Appl. Catal. A-Gen.* **1998**, 170, 169-175.
3. Hincapie B.; Llano S. M.; Garces H. F.; Espinal D.; Suib S. L.; Garces L. J. Epoxidation of cyclopentene by a low cost and environmentally friendly bicarbonate/peroxide/manganese system, *Adsorpt. Sci. Technol.* **2018**, 36, 9-22.
4. Tong J. H.; Liu F. F.; Wang W. H.; Bo L. L.; Mahboob A.; Fan H. Y. Highly Efficient Epoxidation of Cyclopentene Catalyzed by Magnetically Recoverable Mg-doped Cobalt Ferrites with Greatly Improved Performances, *Chemistryselect* **2016**, 1, 6356-6361.
5. Wu P.; Nuntasri D.; Liu Y. M.; Wu H. H.; Jiang Y. W.; Fan W. B.; He M. Y.; Tatsumi T. Selective liquid-phase oxidation of cyclopentene over MWW type titanosilicate, *Catal. Today* **2006**, 117, 199-205.
6. Tong W.; Yin J. P.; Ding L. Y.; Xu H.; Wu P. Modified Ti-MWW Zeolite as a Highly Efficient Catalyst for the Cyclopentene Epoxidation Reaction, *Front. Chem.* **2020**, 8, 585347.
7. Sujandi, Han S. C.; Han D. S.; Jin M. J.; Park S. E. Catalytic oxidation of cycloolefins over Co(cyclam)-functionalized SBA-15 material with H<sub>2</sub>O<sub>2</sub>, *J. Catal.* **2006**, 243, 410-419.
8. Luo Y. L.; Liu C. J.; Yue H. R.; Tang S. Y.; Zhu Y. M.; Liang B. Selective oxidation of cyclopentene with H<sub>2</sub>O<sub>2</sub> by using H<sub>3</sub>PW<sub>12</sub>O<sub>40</sub> and TBAB as a phase transfer catalyst, *Chin. J. Chem. Eng.* **2019**, 27, 1851-1856.
